# Supplementary material
Source: publisher figshare collection journal article supplement (https://sage.figshare.com/ndownloader/files/19255646)
Supplement: Supplementary file 1 [file 19255646]

## Appendix 1

### Ten Studies applying interviews to study terrorism (in the order discussed in the manuscript)

| Authors                               | Interviewees                                                                                                                                                                                                                                                                             | Key conclusions                                                                                                                                                             |
|---------------------------------------|------------------------------------------------------------------------------------------------------------------------------------------------------------------------------------------------------------------------------------------------------------------------------------------|-----------------------------------------------------------------------------------------------------------------------------------------------------------------------------|
| Stern 2003                            | Christian, Jewish and Muslim extremists, violent anti-abortion warriors and admirers of Timothy McVeigh                                                                                                                                                                                  | Grievances give rise to holy war                                                                                                                                            |
| Juergensmeyer 2003                    | Islamic terrorists, Zionists, Christian anti-abortionists, Sikhs, Hindus, the cult of Aum Shinrikyo                                                                                                                                                                                      | Religion motivates terror                                                                                                                                                   |
| Atran 2010                            | Interviews with individuals affiliated with violent groups around the world                                                                                                                                                                                                              | Terrorists are social beings                                                                                                                                                |
| Post, Sprinzak, Denny 2003            | Semi-structured interviews with 35 imprisoned terrorists in the Middle East                                                                                                                                                                                                              | The social environment is key                                                                                                                                               |
| Ferguson, Burgess, and Hollywood 2008 | Face-to-face interviews with paramilitaries or former paramilitaries in Northern Ireland                                                                                                                                                                                                 | Community support for violence is crucial                                                                                                                                   |
| Todd et al. 2006                      | 128 in-depth with an open-ended format in Northern Ireland and the Republic of Ireland                                                                                                                                                                                                   | Identity change is possible and more likely related to conflict than reconciliation                                                                                         |
| Gunning 2008                          | 100 interviews with Hamas members, political opponents, and local activists, engagement with research subjects as 'critical' methodology                                                                                                                                                 | Hamas's decision-making encourages rationalism                                                                                                                              |
| Drevon 2015                           | Semi-structured interviews, participation in group meetings and informal discussions with members of Egyptian al-Gama'a al-Islamiyya and Islamic Jihad                                                                                                                                   | Change from violent to nonviolent participation occurred based on internal reassessment of political opportunities in Egyptian political opening                            |
| Ashour 2007                           | More than 100 interviews from personal encounters, the media, recordings, and official statements with leaders and members of the Egyptian Islamic group, lawyers who defended Islamist suspects, security and former security officials, and specialists on Egyptian Islamist movements | Pragmatism has a final say in the behavior of the Islamic group, De-radicalization happens related to repression, social interaction, selective inducements, and leadership |
| Ibrahim 1988                          | Interviews resembling seminars with hot-tempered exchanges with imprisoned leaders of violent Egyptian groups the Military academy and the Repentance and Holy Fight                                                                                                                     | Islamic militancy is an alternative given the lack of a credible secular vision, socioeconomic prospects of the middle class, the imagination of the educated youth         |



## Appendix 2, Interviewees

### a. Study I

| Name                | Group                                     | Position in Group                    | Occupation at time of interview                 | University Degree                      | Place of Entry into Group |
|---------------------|-------------------------------------------|--------------------------------------|-------------------------------------------------|----------------------------------------|---------------------------|
| A                   | Muslim Brotherhood                        | Follower                             | PhD Student                                     | MA                                     | Cairo                     |
| S                   | Muslim Brotherhood                        | Follower                             | PhD Student                                     | MA                                     | Cairo                     |
| W                   | Muslim Brotherhood                        | Follower                             | Engineer                                        | MA                                     | Cairo                     |
| `Abdelmonem Mahmoud | Muslim Brotherhood                        | Follower                             | Journalist                                      | BA                                     | Alexandria                |
| Saif al-Islam       | Muslim Brotherhood                        | Son of founder of Muslim Brotherhood | Retired MB Leader                               | PhD                                    | Affiliation since birth   |
| Sa`ad Katatni       | Muslim Brotherhood                        | Leader                               | Speaker of Muslim Brothers' Parliamentary Block | PhD                                    | Southern Egypt            |
| Mahmoud `Ezzat      | Muslim Brotherhood                        | Leader                               | Secretary-General of Muslim Brotherhood         | MD                                     | Cairo                     |
| K                   | al-Jihad                                  | Leader                               | Journalist and Writer                           | PhD                                    | Cairo                     |
| B                   | al-Jihad                                  | Leader                               | Journalist                                      | BA                                     | Cairo                     |
| Nageh Ibrahim       | al-Jama'a al-Islamiyya                    | Founder of al-Jama'a al-Islamiyya    | Dermatologist                                   | MD, license in law and Islamic studies | Assyut                    |
| N                   | al-Jama'a al-Islamiyya                    | Follower                             | Veterinary                                      | MD                                     | ?                         |
| T                   | al-Jama'a al-Islamiyya                    | Follower                             | Chemist                                         | PhD                                    | Southern Egypt            |
| Muntasser al-Zayyat | al-Jama'a al-Islamiyya                    | Former Leader                        | Lawyer                                          | JD                                     | Southern Egypt            |
| Y                   | al-Jama'a al-Islamiyya                    | Former Leader                        | Writer                                          | BA                                     | Southern Egypt            |
| I                   | Preached in al-Jama'a al-Islamiyya mosque | Says he was never part of JA         | ?                                               | Law Degree                             | -                         |
| H                   | Rote Zelle                                | Follower                             | Self-Employed                                   | MA                                     | Münster                   |
| Rainer Langhans     | Kommune 1, Socialist German Student Union | Founder of K1                        | Author                                          | Studied law                            | Berlin                    |
| Bernd Rabehl        | Kommune 1, Socialist German Student Union | Among first Members of K1            | Author                                          | Professor                              | Berlin                    |
| Ulrich Enzensberger | Kommune 1                                 | First Members of Kommune             | Author                                          | University degree                      | Berlin                    |

|                   |                                |                                      |                     |                   |           |
|-------------------|--------------------------------|--------------------------------------|---------------------|-------------------|-----------|
| Tilman Fichter    | Socialist German Student Union | Leader                               | Political Scientist | MA                | Berlin    |
| Jürgen Holtfreter | Independent                    | -                                    | Self-Employed       | Apprentice -ship  | -         |
| Karl-Heinz Dellwo | Red Army Faction               | Member of 2 <sup>nd</sup> generation | Author, Filmmaker   | Apprentice -ship  | Hamburg   |
| L                 | Red Army Faction               | Member of 2 <sup>nd</sup> generation | Community Worker    | ?                 | Karlsruhe |
| E                 | Red Army Faction               | Member of 1 <sup>st</sup> generation | -                   | University degree | Berlin    |
| O                 | Red Army Faction               | Member of 2 <sup>nd</sup> generation | Employee            | -                 | Karlsruhe |
| R                 | Bewegung 2. Juni               | member                               | Self-Employed       | Apprentice -ship  | Berlin    |
| G                 | Bewegung 2. Juni               | member                               | Self-employed       | Apprentice -ship  | Berlin    |

## b. Study II

| Gender | Age group | Occupation    | Place      | Behavior    | Number |
|--------|-----------|---------------|------------|-------------|--------|
| male   | 30-50     | engineer      | Rabat      | protest     | 1      |
| male   | 30-50     | employee      | Rabat      | protest     | 2      |
| male   | >50       | politician    | Rabat      | protest     | 3      |
| male   | >50       | journalist    | Rabat      | protest     | 4      |
| male   | 30-50     | Muslim leader | Casablanca | protest     | 5      |
| male   | 20-30     | journalist    | Casablanca | protest     | 6      |
| male   | 30-50     | academic      | Rabat      | protest     | 7      |
| male   | 30-50     | journalist    | Rabat      | protest     | 8      |
| male   | 20-30     | student       | Marrakech  | protest     | 9      |
| female | 20-30     | psychologist  | Rabat      | protest     | 10     |
| male   | <20       | student       | Rabat      | protest     | 11     |
| male   | 30-50     | employee      | Rabat      | protest     | 12     |
| male   | 30-50     | employee      | Rabat      | protest     | 13     |
| male   | 30-50     | journalist    | Casablanca | protest     | 14     |
| male   | 20-30     | student       | Casablanca | protest     | 15     |
| male   | 20-30     | banker        | Rabat      | protest     | 16     |
| female | >50       | housewife     | Alexandria | protest     | 17     |
| male   | >50       | retired       | Alexandria | protest     | 18     |
| female | 30-50     | teacher       | Cairo      | protest     | 19     |
| female | 30-50     | academic      | Cairo      | protest     | 20     |
| male   | 30-50     | banker        | Cairo      | protest     | 21     |
| male   | 30-50     | merchant      | Cairo      | protest     | 22     |
| male   | 20-30     | employee      | Cairo      | protest     | 23     |
| female | 30-50     | employee      | Cairo      | protest     | 24     |
| male   | 20-30     | employee      | Cairo      | protest     | 25     |
| male   | 30-50     | merchant      | Alexandria | protest     | 26     |
| male   | 30-50     | employee      | Cairo      | protest     | 27     |
| male   | 30-50     | employee      | Alexandria | protest     | 28     |
| female | 30-50     | journalist    | Cairo      | protest     | 29     |
| male   | 20-30     | employee      | Cairo      | protest     | 30     |
| female | 20-30     | student       | Cairo      | protest     | 31     |
| male   | 20-30     | student       | Marrakech  | non-protest | 1      |
| male   | 30-50     | donkey rider  | Marrakech  | non-protest | 2      |
| female | 20-30     | employee      | Marrakech  | non-protest | 3      |
| female | <20       | employee      | Marrakech  | non-protest | 4      |
| male   | 30-50     | merchant      | Marrakech  | non-protest | 5      |
| male   | 30-50     | merchant      | Rabat      | non-protest | 6      |
| male   | 30-50     | merchant      | Rabat      | non-protest | 7      |
| female | 30-50     | pharmacist    | Salé       | non-protest | 8      |
| male   | 20-30     | employee      | Rabat      | non-protest | 9      |
| male   | 30-50     | librarian     | Rabat      | non-protest | 10     |

|        |       |                |            |             |    |
|--------|-------|----------------|------------|-------------|----|
| female | 20-30 | employee       | Rabat      | non-protest | 11 |
| female | 30-50 | employee       | Rabat      | non-protest | 12 |
| male   | 30-50 | employee       | Rabat      | non-protest | 13 |
| male   | 20-30 | employee       | Rabat      | non-protest | 14 |
| male   | 30-50 | employee       | Rabat      | non-protest | 15 |
| female | 20-30 | lawyer         | Rabat      | non-protest | 16 |
| female | 30-50 | teacher        | Salé       | non-protest | 17 |
| female | 30-50 | employee       | Rabat      | non-protest | 18 |
| male   | 20-30 | merchant       | Marrakech  | non-protest | 19 |
| female | 30-50 | cleaner        | Marrakech  | non-protest | 20 |
| female | <20   | employee       | Marrakech  | non-protest | 21 |
| male   | >50   | security guard | Marrakech  | non-protest | 22 |
| male   | 20-30 | student        | Rabat      | non-protest | 23 |
| male   | 20-30 | banker         | Rabat      | non-protest | 24 |
| female | 30-50 | merchant       | Rabat      | non-protest | 25 |
| male   | 20-30 | employee       | Rabat      | non-protest | 26 |
| female | 20-30 | accountant     | Rabat      | non-protest | 27 |
| female | 30-50 | employee       | Rabat      | non-protest | 28 |
| male   | 20-30 | employee       | Rabat      | non-protest | 29 |
| male   | >50   | merchant       | Rabat      | non-protest | 30 |
| male   | 20-30 | manager        | Rabat      | non-protest | 31 |
| male   | 30-50 | employee       | Marrakech  | non-protest | 32 |
| female | 20-30 | employee       | Marrakech  | non-protest | 33 |
| male   | >50   | employee       | Rabat      | non-protest | 34 |
| female | >50   | employee       | Rabat      | non-protest | 35 |
| male   | 30-50 | journalist     | Rabat      | non-protest | 36 |
| male   | 30-50 | businessman    | Cairo      | non-protest | 37 |
| male   | 20-30 | employee       | Cairo      | non-protest | 38 |
| male   | 30-50 | banker         | Cairo      | non-protest | 39 |
| male   | <20   | employee       | Cairo      | non-protest | 40 |
| male   | 30-50 | employee       | Cairo      | non-protest | 41 |
| male   | 30-50 | employee       | Cairo      | non-protest | 42 |
| male   | >50   | employee       | Cairo      | non-protest | 43 |
| male   | 20-30 | employee       | Cairo      | non-protest | 44 |
| male   | 20-30 | employee       | Cairo      | non-protest | 45 |
| male   | 30-50 | employee       | Cairo      | non-protest | 46 |
| male   | 30-50 | banker         | Cairo      | non-protest | 47 |
| male   | >50   | retired        | Alexandria | non-protest | 48 |
| female | >50   | housewife      | Alexandria | non-protest | 49 |
| female | 30-50 | teacher        | Cairo      | non-protest | 50 |
| female | 30-50 | academic       | Cairo      | non-protest | 51 |
| male   | 30-50 | employee       | Cairo      | non-protest | 52 |
| female | 30-50 | employee       | Cairo      | non-protest | 53 |
| male   | 30-50 | policeman      | Cairo      | non-protest | 54 |
| male   | 30-50 | unemployed     | Cairo      | non-protest | 55 |

|        |       |            |       |             |    |
|--------|-------|------------|-------|-------------|----|
| female | >50   | employee   | Cairo | non-protest | 56 |
| female | >50   | cleaner    | Cairo | non-protest | 57 |
| male   | 30-50 | academic   | Cairo | non-protest | 58 |
| male   | 30-50 | pharmacist | Cairo | non-protest | 59 |
| male   | >50   | employee   | Cairo | non-protest | 60 |
| male   | 20-30 | employee   | Cairo | non-protest | 61 |
| male   | 20-30 | employee   | Cairo | non-protest | 62 |

### c. Study III

| Index | Sex | Age | Place     | Job                            |
|-------|-----|-----|-----------|--------------------------------|
| 1     | M   | 23  | Bethlehem | Employee in wood factory       |
| 2     | M   | 40  | Bethlehem | Manager of hair salon          |
| 3     | M   | 27  | Bethlehem | Employee in launderette        |
| 4     | F   | 25  | Bethlehem | Employee in bank               |
| 5     | F   | 28  | Bethlehem | Employee in bank               |
| 6     | F   | 64  | Jerusalem | Director of NGO                |
| 7     | F   | 32  | Hebron    | Teacher                        |
| 8     | F   | 41  | Bethlehem | Librarian                      |
| 9     | F   | 33  | Jerusalem | Employee in NGO                |
| 10    | M   | 29  | Bethlehem | Teacher                        |
| 11    | F   | 39  | Jerusalem | Director of cultural institute |
| 12    | M   | 30  | Jerusalem | Owner of bookshop              |
| 13    | M   | 50  | Bethlehem | Professor                      |
| 14    | M   | 70  | Bethlehem | Director of NGO                |
| 15    | M   | 44  | Jerusalem | Start-up founder               |
| 16    | M   | 35  | Bethlehem | Employee at church             |
| 17    | F   | 28  | Ramallah  | Employee at UN                 |
| 18    | F   | 28  | Hebron    | PhD student                    |
| 19    | M   | 23  | Bethlehem | Shop owner                     |
| 20    | F   | 25  | Bethlehem | Employee in hotel              |
| 21    | M   | 70  | Bethlehem | Hotel owner                    |
| 22    | M   | 22  | Bethlehem | Employee in tourist shop       |



|    |   |    |           |                          |
|----|---|----|-----------|--------------------------|
| 23 | F | 55 | Bethlehem | Employee in tourist shop |
| 24 | F | 25 | Bethlehem | Secretary at university  |
| 25 | M | 63 | Ramallah  | Director of NGO          |
| 26 | M | 36 | Ramallah  | PhD student              |
| 27 | M | 41 | Ramallah  | Post-doctoral student    |
| 28 | F | 25 | Bethlehem | Employee in copy shop    |
| 29 | M | 25 | Bethlehem | Employee in copy shop    |
| 30 | F | 25 | Ramallah  | PhD student              |
| 31 | M | 54 | Bethlehem | Priest                   |
| 32 | M | 32 | Bethlehem | Accountant               |

## Appendix 3, Coding schemes

### a. Study I

| Theme             | Domain                    | Categories within domain                  | Quotes from interviews                                                      |
|-------------------|---------------------------|-------------------------------------------|-----------------------------------------------------------------------------|
| STATE ENVIRONMENT | Home State Environment    | Continuous Aggression by Home State       | There was a circle of violence conducted by the state                       |
|                   |                           | Aggression by Home State                  | Sadat arrested the brother of Khalid Islambouli                             |
|                   |                           | Domination by Home State                  | There was no real party, only Sadat's party                                 |
|                   |                           | Strained Living Conditions                | There was social poverty                                                    |
|                   |                           | Unreligious State                         | My country wasn't Islamic                                                   |
|                   |                           | Aggression by Previous State              | Hitler waged the Second World War                                           |
|                   |                           | Domination by Previous State              | People had lived under the terrible Nazis                                   |
|                   |                           | Change of Home State                      | Sadat changed everything                                                    |
|                   |                           | Ignorance of Fellow Citizens              | The people are interested in the African cup, not politics                  |
|                   |                           | Support by Home State                     | The state agency gave me an apprenticeship as a librarian                   |
|                   |                           | Religious Government                      | The government is Muslim                                                    |
|                   |                           | Education of the People                   | The people become educated                                                  |
|                   |                           | Absence of Oppression by Home State       | Sadat had given us freedom                                                  |
|                   |                           | Absence of Aggression by Home State       | The police stood in front of the building for days and didn't do anything   |
|                   |                           | Absence of State Structures               | If there were no state structures                                           |
|                   | System of States          | Aggression by Foreign State               | General Taylor said they were going to bomb Vietnam back into the Stone Age |
|                   |                           | Imperialism                               | The US conducts imperialism                                                 |
|                   |                           | Disunity of Muslims                       | The ummah is suffering from disunity                                        |
|                   |                           | Absence of Domination by Foreign State    | We have to thank the Americans and the British for freedom of speech        |
| STATE PERCEPTIONS | Value of state structures | Superiority of state structure            | The state law must be accepted even if it is unjust                         |
|                   |                           | Indispensability of state structure       | We need a structure organizing life                                         |
|                   |                           | Acceptance of state structure             | I respect the law                                                           |
|                   |                           | Acceptance of state aggression            | Prison and torture are an exam given by God                                 |
|                   |                           | Acceptance of state representative        | State representatives have a human dignity                                  |
|                   |                           | Absence of acceptance of state aggression | We denied the state the right to use violence against the people            |
|                   |                           | Absence of acceptance of state            | I thought it was unbearable to never say anything political                 |
|                   |                           | Duty for action against state             | I must act if I see that the government does something wrong                |
|                   | State power               | Strength of state                         | The government is strong                                                    |
|                   |                           | Absence of strength of state              | The state had difficulties to find employees for top positions              |
|                   |                           | Strength of foreign state                 | There were the secret services of the US and the Russians                   |

|       |                           |                                                                |                                                                                                       |
|-------|---------------------------|----------------------------------------------------------------|-------------------------------------------------------------------------------------------------------|
|       | Power of state resistance | Weakness of foreign state                                      | The US had lost the war in Vietnam                                                                    |
|       |                           | Importance of the people                                       | We, the people, are all one                                                                           |
|       |                           | Victory of international resistance against state system       | The resistance was successful in Iran and the Sudan                                                   |
|       |                           | Weakness of international resistance against state system      | The Ummah is deteriorating                                                                            |
|       |                           | Flexible structure of resistance                               | Resistance groups had a very rigid structure                                                          |
|       |                           | Strength of local resistance                                   | Societal movements were spreading                                                                     |
|       |                           | Weakness of local resistance                                   | We [resistance group] failed to occupy the building                                                   |
| GOALS | Political goals           | Absolute priority of political goal                            | Political change was more important to me than anything else                                          |
|       |                           | Absence of priority of political goal                          | We didn't question power structures. We were satisfied with changing the mentality of the generation. |
|       |                           | Political goal                                                 | I wanted to change the government.                                                                    |
|       | Private goals             | Absolute priority of private goal                              | Self-fulfillment has absolute priority in my life                                                     |
|       |                           | Private goal                                                   | I had the wish of an easy life with wealth                                                            |
| MEANS | Availability              | Possibility for violence                                       | I thought of violence for the first time                                                              |
|       |                           | Absence of peaceful means                                      | There is no justice by peaceful means                                                                 |
|       |                           | Alternative to violence                                        | I had an alternative to violence                                                                      |
|       |                           | Possibility for nonviolent resistance                          | It is possible to not participate in politics and not use violence. Many Egyptians do that.           |
|       | Value                     | Necessity for violence                                         | The question of not using violence did not pose itself                                                |
|       |                           | Absence of necessity for violence                              | Violence is not a duty, even if you see something bad                                                 |
|       |                           | Insufficiency of peaceful means                                | We wanted more than da'awa [invitation to Islam]                                                      |
|       |                           | Enjoyment of violence                                          | I liked shooting                                                                                      |
|       |                           | Dislike of violence                                            | I hated violence                                                                                      |
|       |                           | Absence of approval for violence by family                     | My mom told me to never do anything like this                                                         |
|       |                           | Absence of approval for violence by the people                 | The people would never support us if we used violence                                                 |
|       |                           | Support for nonviolent activity from the people                | The activities of the Muslim Brotherhood are very popular                                             |
|       |                           | Support for nonviolent activity from foreign state             | The US supported us in 2005 [when the Muslim Brotherhood gained numerous seats in the elections]      |
|       |                           | Support for violence from the people                           | We thought the people agreed [to using violence]                                                      |
|       | Application               | Existence of international resistance against system of states | We saw ourselves in the international context of freedom movements                                    |
|       |                           | Existence of violent resistance against home state             | Some people who went to prison turned against the government with force                               |
|       |                           | Existence of violent resistance against foreign state          | The Red Army Faction attacked the US headquarters                                                     |
|       |                           | Existence of nonviolent resistance against home state          | The MB have hopes in politics and they are totally against violence.                                  |

|                       |                                |                                                                |                                                                                                                 |
|-----------------------|--------------------------------|----------------------------------------------------------------|-----------------------------------------------------------------------------------------------------------------|
|                       |                                | Existence of nonviolent resistance against foreign state       | There were bread strikes and demonstrations against Israel.                                                     |
|                       |                                | Nonviolent activity against foreign state                      | I demonstrated against the US                                                                                   |
|                       |                                | Nonviolent activity supporting state                           | We were producing a newspaper for Daimler                                                                       |
| CONSEQUENCES OF MEANS | Consequences of violence       | Acceptance of negative consequences of violence                | I was ready to die for this                                                                                     |
|                       |                                | Possibility of reaching goals by violence                      | I thought at the time that the army could bring the change [talking about the assassination of President Sadat] |
|                       |                                | Avoidance of negative consequences of violence                 | We had to go abroad [talking about the RAF siege of the German embassy in Sweden]                               |
|                       |                                | Absence of acceptance of negative consequences of violence     | A bad government is better than a war killing thousands                                                         |
|                       |                                | Negative consequences of victories of international resistance | People were dominated in Cuba, where Batista created an authoritarian state                                     |
|                       |                                | Impossibility of reaching goals by violence                    | There is no way that violence can change the state                                                              |
|                       |                                | Absence of success of violence against foreign state           | There was no success of violence in Algeria and the Sudan                                                       |
|                       |                                | Negative consequences of violence                              | Violence kills people                                                                                           |
|                       | Consequences of peaceful means | Possibility of reaching goals by peaceful means                | Elections are the only way to improve society                                                                   |
|                       |                                | Success of peaceful activity against state                     | This protected us, Newell [political activist] was not tortured                                                 |
|                       |                                | Absence of success of peaceful activity against state          | I had no success to get justice at court                                                                        |
| PRIVATE LIFE          | Personality                    | Self-conviction                                                | I had very strong beliefs                                                                                       |
|                       |                                | Psychological problems                                         | I suffered from psychological problems                                                                          |
|                       |                                | Weakness of will                                               | I was very lazy                                                                                                 |
|                       |                                | Interest in politics                                           | I became interested in politics                                                                                 |
|                       |                                | Absence of interest in politics                                | I had no interest in politics                                                                                   |
|                       | Experiences                    | Education                                                      | My mom taught me values                                                                                         |
|                       |                                | Absence of education                                           | There was no kindergarden, nobody cared about us                                                                |
|                       |                                | Leisure                                                        | I started reading                                                                                               |
|                       |                                | Success                                                        | I became a doctor                                                                                               |
|                       |                                | Absence of success                                             | I didn't finish my studies                                                                                      |
|                       |                                | Distance from others                                           | I started to distance myself from my family                                                                     |
|                       |                                | Joining the army                                               | I joined the military                                                                                           |
|                       |                                | Refusal to join the army                                       | I refused to join the army                                                                                      |
|                       | Religious beliefs              | Obedience to God                                               | There are religious duties                                                                                      |
|                       |                                | God's might                                                    | God determines the outcome                                                                                      |

## b. Study II

| Type                | Factor                             | Quote                                                                                               |
|---------------------|------------------------------------|-----------------------------------------------------------------------------------------------------|
| state behavior      | crime by state actor               | The government is very corrupt.                                                                     |
|                     | violence by state actor            | Three armored cars of riot police, tons of hired thugs, and officers came down to terrorize us.     |
|                     | crime by prior state               | By the time the people showed up at the urns, the elections had already been decided.               |
|                     | violence by prior state            | Hassan II killed the entire opposition.                                                             |
|                     | pass power to family member        | Mubarak wanted his son to be President.                                                             |
|                     | violence by family member          | Gamal [Mubarak] was very violent.                                                                   |
|                     | isolation of prior head of state   | The previous president had the problem that nobody supported him.                                   |
|                     | crime by army                      | The army took over power against the wishes of many.                                                |
|                     | protection by army                 | The army came to protect the wishes of the people.                                                  |
|                     | lack of effort by head of state    | The King makes no effort for the people.                                                            |
|                     | effort by head of state            | The King does everything for us.                                                                    |
| external conditions | poor living conditions             | There is poverty and hunger. I know that 30 million are dreaming of food.                           |
|                     | violence abroad                    | Look at the violence in Iraq.                                                                       |
|                     | lack of safety                     | It is very unsafe.                                                                                  |
|                     | safety                             | We can move freely on the streets without fear from attacks.                                        |
|                     | ignorance                          | We did not even know the name of our own Foreign Minister.                                          |
|                     | unemployment                       | There is unemployment.                                                                              |
|                     | being employed                     | I have a job.                                                                                       |
|                     | job availability                   | If you need work, you can go and look for it. There is no unemployment.                             |
|                     | improved living conditions         | People in the villages have better salaries now.                                                    |
|                     | good living conditions             | Everyone here lives well.                                                                           |
|                     | deterioration of living conditions | The economy is getting worse.                                                                       |
|                     | deterioration of politics          | The political situation is getting worse and worse.                                                 |
|                     | improvement of political situation | It is getting better. There is a political system again.                                            |
|                     | freedom                            | The boundaries of freedom are wide here.                                                            |
|                     | diversity                          | We are an amalgam of different ethnicities.                                                         |
|                     | absence of free press              | Investigative journalism is dead.                                                                   |
|                     | free press                         | There is equality between opposition newspapers and governmental newspapers.                        |
|                     | lack of unity of the people        | The country is divided now.                                                                         |
|                     | unity of the people                | Everyone is participating.                                                                          |
|                     | history                            | Our system is 400 years old.                                                                        |
|                     | international environment          | Suddenly, there was a new international order.                                                      |
|                     | absence of monarchical system      | We are not a monarchy.                                                                              |
|                     | absence of system                  | There is no system. Look at this street! [points at roadworkers digging up the street]              |
|                     | lack of alternative                | There was no alternative.                                                                           |
|                     | possibility for protest            | I thought about protesting for the first time.                                                      |
|                     | conspiracy                         | In Egypt, they showed a pretty woman in front of the Nile. On al-Jazeera, they showed the protests. |
|                     | uncertainty                        | But one does not know what will happen next.                                                        |
|                     | human nature                       | This is human nature.                                                                               |

|                                               |                                   |                                                                                                                                                                                      |
|-----------------------------------------------|-----------------------------------|--------------------------------------------------------------------------------------------------------------------------------------------------------------------------------------|
| <b>events</b>                                 | experience by friend              | I have a friend who was there. She told me. [talk about Rabaa massacre]                                                                                                              |
|                                               | protest                           | There were protests every day.                                                                                                                                                       |
|                                               | revolution in Tunisia             | It worked in Tunisia. The regime fell.                                                                                                                                               |
|                                               | change of head of state           | Mohammad V followed his father.                                                                                                                                                      |
|                                               | election                          | We had many elections.                                                                                                                                                               |
|                                               | resistance from army              | The army resisted the President.                                                                                                                                                     |
| <b>actions, protestors, people, self</b>      | self-sacrifice                    | Four Egyptians have set themselves on fire to protest.                                                                                                                               |
|                                               | absence prior protest experience  | I had never protested in my entire life.                                                                                                                                             |
|                                               | protection of protestors          | The people protect the protestors.                                                                                                                                                   |
|                                               | effort for self                   | I make a big effort for myself all the time.                                                                                                                                         |
|                                               | lack of success in private life   | I cannot manage to find a husband.                                                                                                                                                   |
|                                               | effort by the people              | The people work very hard.                                                                                                                                                           |
|                                               | obedience by the people           | The people do what they are told to do.                                                                                                                                              |
|                                               | lack of effort by the people      | Unfortunately, most people make very little effort.                                                                                                                                  |
|                                               | violence by protestors            | I was harassed by the protestors.                                                                                                                                                    |
|                                               | crime by people                   | The people are bad. There was a woman who accused a housekeeper of something he had not done. She talked to a friend in the police, and arranged for the housekeeper to be arrested. |
|                                               | prior protest experience          | I had often participated in protests with them.                                                                                                                                      |
| <b>emotions</b>                               | interaction with protestors       | I have access to the Movement of 20 <sup>th</sup> February.                                                                                                                          |
|                                               | courage                           | I am not afraid of not returning                                                                                                                                                     |
|                                               | national pride                    | I am a proud Egyptian.                                                                                                                                                               |
|                                               | hope                              | We will be liberated from oppression                                                                                                                                                 |
|                                               | solidarity                        | For the protection of the protestors we will resist any attack.                                                                                                                      |
|                                               | curiosity                         | We were very curious to see what was happening.                                                                                                                                      |
|                                               | dissatisfaction                   | I am not happy with my life.                                                                                                                                                         |
|                                               | satisfaction                      | I am happy with my life.                                                                                                                                                             |
|                                               | moral outrage                     | I cannot bear this feeling of insult.                                                                                                                                                |
|                                               | hopelessness                      | We lost our hope.                                                                                                                                                                    |
|                                               | fear                              | I am afraid.                                                                                                                                                                         |
|                                               | modesty                           | I am overrated, I do not deserve to be in this position.                                                                                                                             |
| <b>needs</b>                                  | surprise                          | I was very surprised, I could not believe it.                                                                                                                                        |
|                                               | need to unite for protest         | The people must unite against the regime.                                                                                                                                            |
|                                               | need for courage                  | Let us overcome the barrier of fear.                                                                                                                                                 |
|                                               | need for solidarity               | We need solidarity with the protestors.                                                                                                                                              |
|                                               | absence of need for protest       | I have no reason to join.                                                                                                                                                            |
|                                               | need for change in people         | You need to change the people, not the politicians.                                                                                                                                  |
|                                               | need for change of state          | It is time to take power from this dictator.                                                                                                                                         |
|                                               | need for strength of protestors   | We needed force.                                                                                                                                                                     |
| <b>capabilities, protestors, people, self</b> | strength of protestors            | Many people joined them from the desert. 25,000 protested from all categories of society.                                                                                            |
|                                               | absence of strength of protestors | They [protestors] were always suppressed.                                                                                                                                            |
|                                               | success by protestors             | The protestors were successful.                                                                                                                                                      |
|                                               | absence of protest result         | They [the government] ignored us completely. None of our demands was met. We did not achieve anything.                                                                               |
|                                               | strength of the people            | The thugs are afraid of entering their [the people] middle.                                                                                                                          |
|                                               | lack of support for protestors    | The people do not support the protests.                                                                                                                                              |
|                                               | skills of protestors              | The protestors are very knowledgeable.                                                                                                                                               |
|                                               | lack of skills of protestors      | Fevrier 20 are amateurs, but it is not their fault. They have no experience.                                                                                                         |

|                                              |                                                  |                                                                                                                                                           |
|----------------------------------------------|--------------------------------------------------|-----------------------------------------------------------------------------------------------------------------------------------------------------------|
|                                              | lack of skills of the people                     | Our people have no skills.                                                                                                                                |
|                                              | support for protestors                           | The protests spread very quickly.                                                                                                                         |
|                                              | self-support                                     | I made a big effort to educate myself.                                                                                                                    |
| <b>capabilities state</b>                    | old age of head of state                         | Mubarak was very old.                                                                                                                                     |
|                                              | superiority of army                              | The army is the best thing in Egypt.                                                                                                                      |
|                                              | strength of army                                 | Our army is very strong.                                                                                                                                  |
|                                              | strength of prior head of state                  | Sadat won the war.                                                                                                                                        |
|                                              | absence of skills of prior head of state         | He was very unprofessional. He should have made changes earlier.                                                                                          |
|                                              | skills of head of state                          | He knows what he is doing.                                                                                                                                |
|                                              | strength of head of state                        | The King is very strong.                                                                                                                                  |
|                                              | strength of state                                | Morocco is a very strong dictatorship.                                                                                                                    |
|                                              | strength of nation                               | Egypt is very strong.                                                                                                                                     |
| <b>personality, state</b>                    | bad personality head of state                    | He is not a good person.                                                                                                                                  |
|                                              | bad personality ruling family                    | Gamal [Mubarak] has a very bad personality: He drank alcohol and had a famous singer kidnapped.                                                           |
|                                              | bad personality prior head of state              | Hassan II was a very bad person.                                                                                                                          |
|                                              | good personality head of state                   | He is modest, he is a king of the people.                                                                                                                 |
|                                              | lack of personality prior head of state          | He had absolutely no personality.                                                                                                                         |
| <b>personality, protestors, people, self</b> | interest in politics                             | For the first time in my life I became interested in politics.                                                                                            |
|                                              | bad personality of the people                    | You have to beat the people. Beatings and intimidation are the only means that work. If you tell someone to turn right on this street, he will not do it. |
|                                              | absence of interest in politics                  | I am not interested in anything related to politics.                                                                                                      |
|                                              | good personality of self                         | It is my nature to stay away from trouble.                                                                                                                |
|                                              | good personality of the people                   | The people are good, they do not use violence.                                                                                                            |
|                                              | personality of self                              | It is against my personality.                                                                                                                             |
| <b>non-state actors</b>                      | friends                                          | I have my friends.                                                                                                                                        |
|                                              | family                                           | I have my family.                                                                                                                                         |
|                                              | media                                            | We were watching them on Facebook.                                                                                                                        |
| <b>religion</b>                              | religious extremism                              | We have religious extremism.                                                                                                                              |
|                                              | absence of religion                              | This is not Islam.                                                                                                                                        |
|                                              | god's might                                      | God will protect us from injury.                                                                                                                          |
|                                              | religion                                         | We have our religion.                                                                                                                                     |
| <b>attitude, state</b>                       | absence of approval of ruling family             | We did not want Gamal [Mubarak] to become President.                                                                                                      |
|                                              | approval of prior head of state                  | Mubarak was good.                                                                                                                                         |
|                                              | absence of responsibility of crime head of state | The bribes were made by others, by ministers and family, not him.                                                                                         |
|                                              | absence of approval of prior head of state       | Mohamed V could not be like his father.                                                                                                                   |
|                                              | approval of head of state                        | al-Sisi is great.                                                                                                                                         |
|                                              | absence of approval of head of state             | We do not like him.                                                                                                                                       |
|                                              | absence of approval of prior head of state       | Nobody liked him.                                                                                                                                         |
| <b>attitude, protestors</b>                  | absence of approval of protestors                | I do not agree with them.                                                                                                                                 |
|                                              | absence of importance of individual              | My participation [in the protests] was not necessary.                                                                                                     |
|                                              | approval of protestors                           | May God support them.                                                                                                                                     |
| <b>preferences</b>                           | absence of priority of self                      | I am not so important.                                                                                                                                    |
|                                              | priority of self                                 | I focus only on what is important to me personally.                                                                                                       |
|                                              | priority of safety                               | There are more important things than protest: stability and safety.                                                                                       |

**Study III:**

**Typologies of grievance and resistance are presented in the main article and previous appendices. Coding for other factors is currently in progress.**



## Appendix 4, Study I

Categories unique to violent versus nonviolent individuals. Direct contrasts discussed in main article marked in bold.

| Theme             | Domain                    | Categories unique to violent individuals                                                                      | Categories unique to nonviolent individuals                                                                                                              |
|-------------------|---------------------------|---------------------------------------------------------------------------------------------------------------|----------------------------------------------------------------------------------------------------------------------------------------------------------|
| State Perceptions | Value of state structure  | <b>Absence of acceptance of state aggression</b>                                                              | <b>Acceptance of state aggression</b><br><br>Superiority of state structures<br><br>Indispensability of state structures<br><br>Importance of the people |
|                   | State power               | <b>Absence of strength of state</b>                                                                           | <b>Strength of foreign state</b><br><br>Weakness of foreign state                                                                                        |
|                   | Power of state resistance | <b>Victory of international resistance against state system</b><br><br>Flexible structure of resistance       | <b>Weakness of international resistance against state system</b><br><br>Weakness of local resistance                                                     |
| Goals             | Private goals             |                                                                                                               | Absolute priority of private goal                                                                                                                        |
|                   | <b>Political goals</b>    | <b>Absolute priority of political goal</b>                                                                    | <b>Absence of absolute priority of political goal</b>                                                                                                    |
| Means             | Availability of means     | Alternative to violence                                                                                       |                                                                                                                                                          |
|                   | Value of means            | <b>Necessity for violence</b><br><br><b>Support for violence from the people</b><br><br>Enjoyment of violence | <b>Absence of necessity for violence</b><br><br><b>Absence of approval for violence by the people</b><br><br>Support for nonviolent                      |

|                       |                                |                                                                                                                                                                      |                                                                                                                                                                 |
|-----------------------|--------------------------------|----------------------------------------------------------------------------------------------------------------------------------------------------------------------|-----------------------------------------------------------------------------------------------------------------------------------------------------------------|
|                       |                                | Dislike of violence<br><br>Insufficiency of peaceful means                                                                                                           | activism from foreign state                                                                                                                                     |
|                       | Application of means           | Existence of international resistance against state system                                                                                                           | Nonviolent activity supporting state                                                                                                                            |
| Consequences of means | Consequences of violence       | <b>Acceptance of negative consequences of violence</b><br><br><b>Possibility of reaching goals by violence</b><br><br>Avoidance of negative consequences of violence | <b>Absence of acceptance of negative consequences of violence</b><br><br>Negative consequences of victories of international resistance                         |
|                       | Consequences of peaceful means |                                                                                                                                                                      | <b>Possibility of reaching goals by peaceful means</b><br><br>Success of nonviolent activism against home state                                                 |
| State Environment     | Home state environment         |                                                                                                                                                                      | Support by home state<br><br>Absence of aggression by home state<br><br>Education of the people<br><br>Religious government<br><br>Aggression by previous state |
|                       | System of states               |                                                                                                                                                                      | <b>Disunity of Muslims</b><br><br>Absence of oppression by foreign states                                                                                       |

|              |                     |                                              |                                                                                         |
|--------------|---------------------|----------------------------------------------|-----------------------------------------------------------------------------------------|
|              |                     |                                              |                                                                                         |
| Private life | Personality         |                                              | Personal problems                                                                       |
|              | Private experiences | Absence of education<br>Distance from others | Absence of interest in politics<br><br>Joining the army<br><br>Refusal to join the army |
|              | Religious beliefs   |                                              | <b>God's might</b>                                                                      |

## Appendix 5, Study II

### a. Quotes from which contrasting categories were identified

| TYPES                      | CONTRASTING CATEGORIES<br>UNIQUE TO PARTICIPANTS | QUOTES                                                                                                                                                                                       |
|----------------------------|--------------------------------------------------|----------------------------------------------------------------------------------------------------------------------------------------------------------------------------------------------|
| STATE BEHAVIOR             | lack of effort by rulers<br>violence by rulers   | Look at this pavement – they haven’t repaired it for years<br>The state police is attacking political opponents                                                                              |
| ACTIONS BY PROTESTORS      | self-sacrifice                                   | Protestors are sacrificing themselves                                                                                                                                                        |
| PREFERENCE                 | absence of priority of self                      | I am willing to sacrifice myself                                                                                                                                                             |
| NEEDS                      | need to unite for protest                        | The people need to become one with the protestors                                                                                                                                            |
| CAPABILITIES OF THE PEOPLE | strength of the people                           | We, the people, are very strong                                                                                                                                                              |
| CAPABILITIES STATE         | old age of rulers                                | Our head of state is already at a very old age                                                                                                                                               |
| PERSONALITY STATE ACTOR    | bad personality head of state                    | Our president is not a good person                                                                                                                                                           |
| PERSONALITY SELF           | interest in politics                             | I have always been interested in politics                                                                                                                                                    |
| RELIGION                   | gods might<br>existence of religious extremism   | God determines what happens on earth<br>There are many extremist religious groups                                                                                                            |
| EMOTIONS                   | courage<br>solidarity<br>modesty<br>curiosity    | I was not feeling any fear of dying<br>I felt united with all the protestors<br>We do not ask for everything, just for a few things<br>I was very curious what was happening on Midan Tahrir |

| TYPES                 | CONTRASTING CATEGORIES<br>UNIQUE TO NON-PARTICIPANTS | QUOTES                                                                                                        |
|-----------------------|------------------------------------------------------|---------------------------------------------------------------------------------------------------------------|
| EMOTIONS              | dissatisfaction                                      | I am very dissatisfied with my life                                                                           |
| STATE BEHAVIOR        | protection by rulers                                 | The King protects us                                                                                          |
| ACTIONS BY PROTESTORS | violence<br>crime                                    | The protestors are very violent against the state<br>The protestors were hired from abroad. They are corrupt. |
| NEEDS                 | absence of need for protest                          | There is no need to protest                                                                                   |

|                            |                                                              |                                                                                                                     |
|----------------------------|--------------------------------------------------------------|---------------------------------------------------------------------------------------------------------------------|
|                            |                                                              |                                                                                                                     |
| CAPABILITIES OF THE PEOPLE | absence of strength of the people                            | The people have no skills                                                                                           |
| CAPABILITIES STATE         | superiority of army<br>strength army<br>skills head of state | The army is the strongest weapon Egypt has ever had<br>Our army is very strong<br>Our head of state has many skills |
| PERSONALITY STATE ACTOR    | good personality head of state                               | The King is a good person                                                                                           |
| PERSONALITY SELF           | absence of interest in politics                              | I don't care about politics                                                                                         |
| PREFERENCE                 | priority of self                                             | I have to protect myself first                                                                                      |

**b. Contrasting categories unique to participants versus non-participants in Arab Spring**

| TYPES                         | CONTRASTING CATEGORIES<br>UNIQUE TO PARTICIPANTS | CONTRASTING CATEGORIES<br>UNIQUE TO NON-PARTICIPANTS         |
|-------------------------------|--------------------------------------------------|--------------------------------------------------------------|
| EMOTIONS                      | courage<br>solidarity<br>modesty<br>curiosity    | dissatisfaction                                              |
| STATE BEHAVIOR                | lack of effort by rulers<br>violence by rulers   | protection by rulers                                         |
| ACTIONS<br>BY PROTESTORS      | self-sacrifice                                   | violence<br>crime                                            |
| NEEDS                         | need to unite for protest                        | absence of need for protest                                  |
| CAPABILITIES OF<br>THE PEOPLE | strength of the people                           | absence of strength of the people                            |
| CAPABILITIES<br>STATE         | old age of rulers                                | superiority of army<br>strength army<br>skills head of state |
| PERSONALITY<br>STATE ACTOR    | bad personality head of state                    | good personality head of state                               |
| PERSONALITY<br>SELF           | interest in politics                             | absence of interest in politics                              |
| PREFERENCE                    | absence of priority of self                      | priority of self                                             |
| RELIGION                      | gods might<br>existence of religious extremism   |                                                              |

## Appendix 6, Study III

### Typology of resistance including quotes

| Resistance                                                                                           | Quote                                                                                                                                                                                                                                                                                                          |
|------------------------------------------------------------------------------------------------------|----------------------------------------------------------------------------------------------------------------------------------------------------------------------------------------------------------------------------------------------------------------------------------------------------------------|
| Raising awareness (international actors, other Palestinians, self)                                   | I love my country, and I am educating my children, so that they love their country, too. I am raising them in a way so that they will support and serve their country. This is my private effort.                                                                                                              |
| Staying in Palestine instead of emigrating                                                           | I am not participating in political activism. The idea is to support the Palestinians by continuing to live here.                                                                                                                                                                                              |
| Protecting daily conduct of life (avoiding arrest and confrontation)                                 | I resist in peaceful ways... Two days ago, a group of us wanted to go to the checkpoint and I resisted this idea. I stayed at work. If they confront the occupier in this way, they will be taken away. This is very dangerous for us. It is better to be conscious of our situation and protect our families. |
| Coping with psychological consequences of grievances (physical exercise, such as yoga, gym, running) | The best way for me to release all the stress I see is to stand on the treadmill.                                                                                                                                                                                                                              |

## **Data Transparency**

Study III has not been published so far. The interviews conducted for Study I were part of a previous publication involving a quantitative analysis, specifically KS tests, Monte Carlo sampling, and a computational analysis. This article focuses on the qualitative analysis of ethnographic interviews instead, specifically Spradley's ethnographic analysis focusing on themes, domains, taxonomies, and contrasts. The interviews conducted for Study II are part of a forthcoming publication applying a quantitative analysis, specifically two-proportion z-tests, and a computational analysis identifying minimum sets of categories related to protest decisions. This article instead focuses on the qualitative interview analysis, namely, Corbin's and Strauss' grounded theory (axial and open coding). This article is also the first to integrate all three studies.
